# Supplementary material for: Genome sequencing and CAZymes repertoire analysis of Diaporthe eres P3-1W causing postharvest fruit rot of ‘Hongyang’ kiwifruit in China
Source: PeerJ journal article supplement (doi:10.7717/peerj.17715), 2024-08-05

KEGG Classification

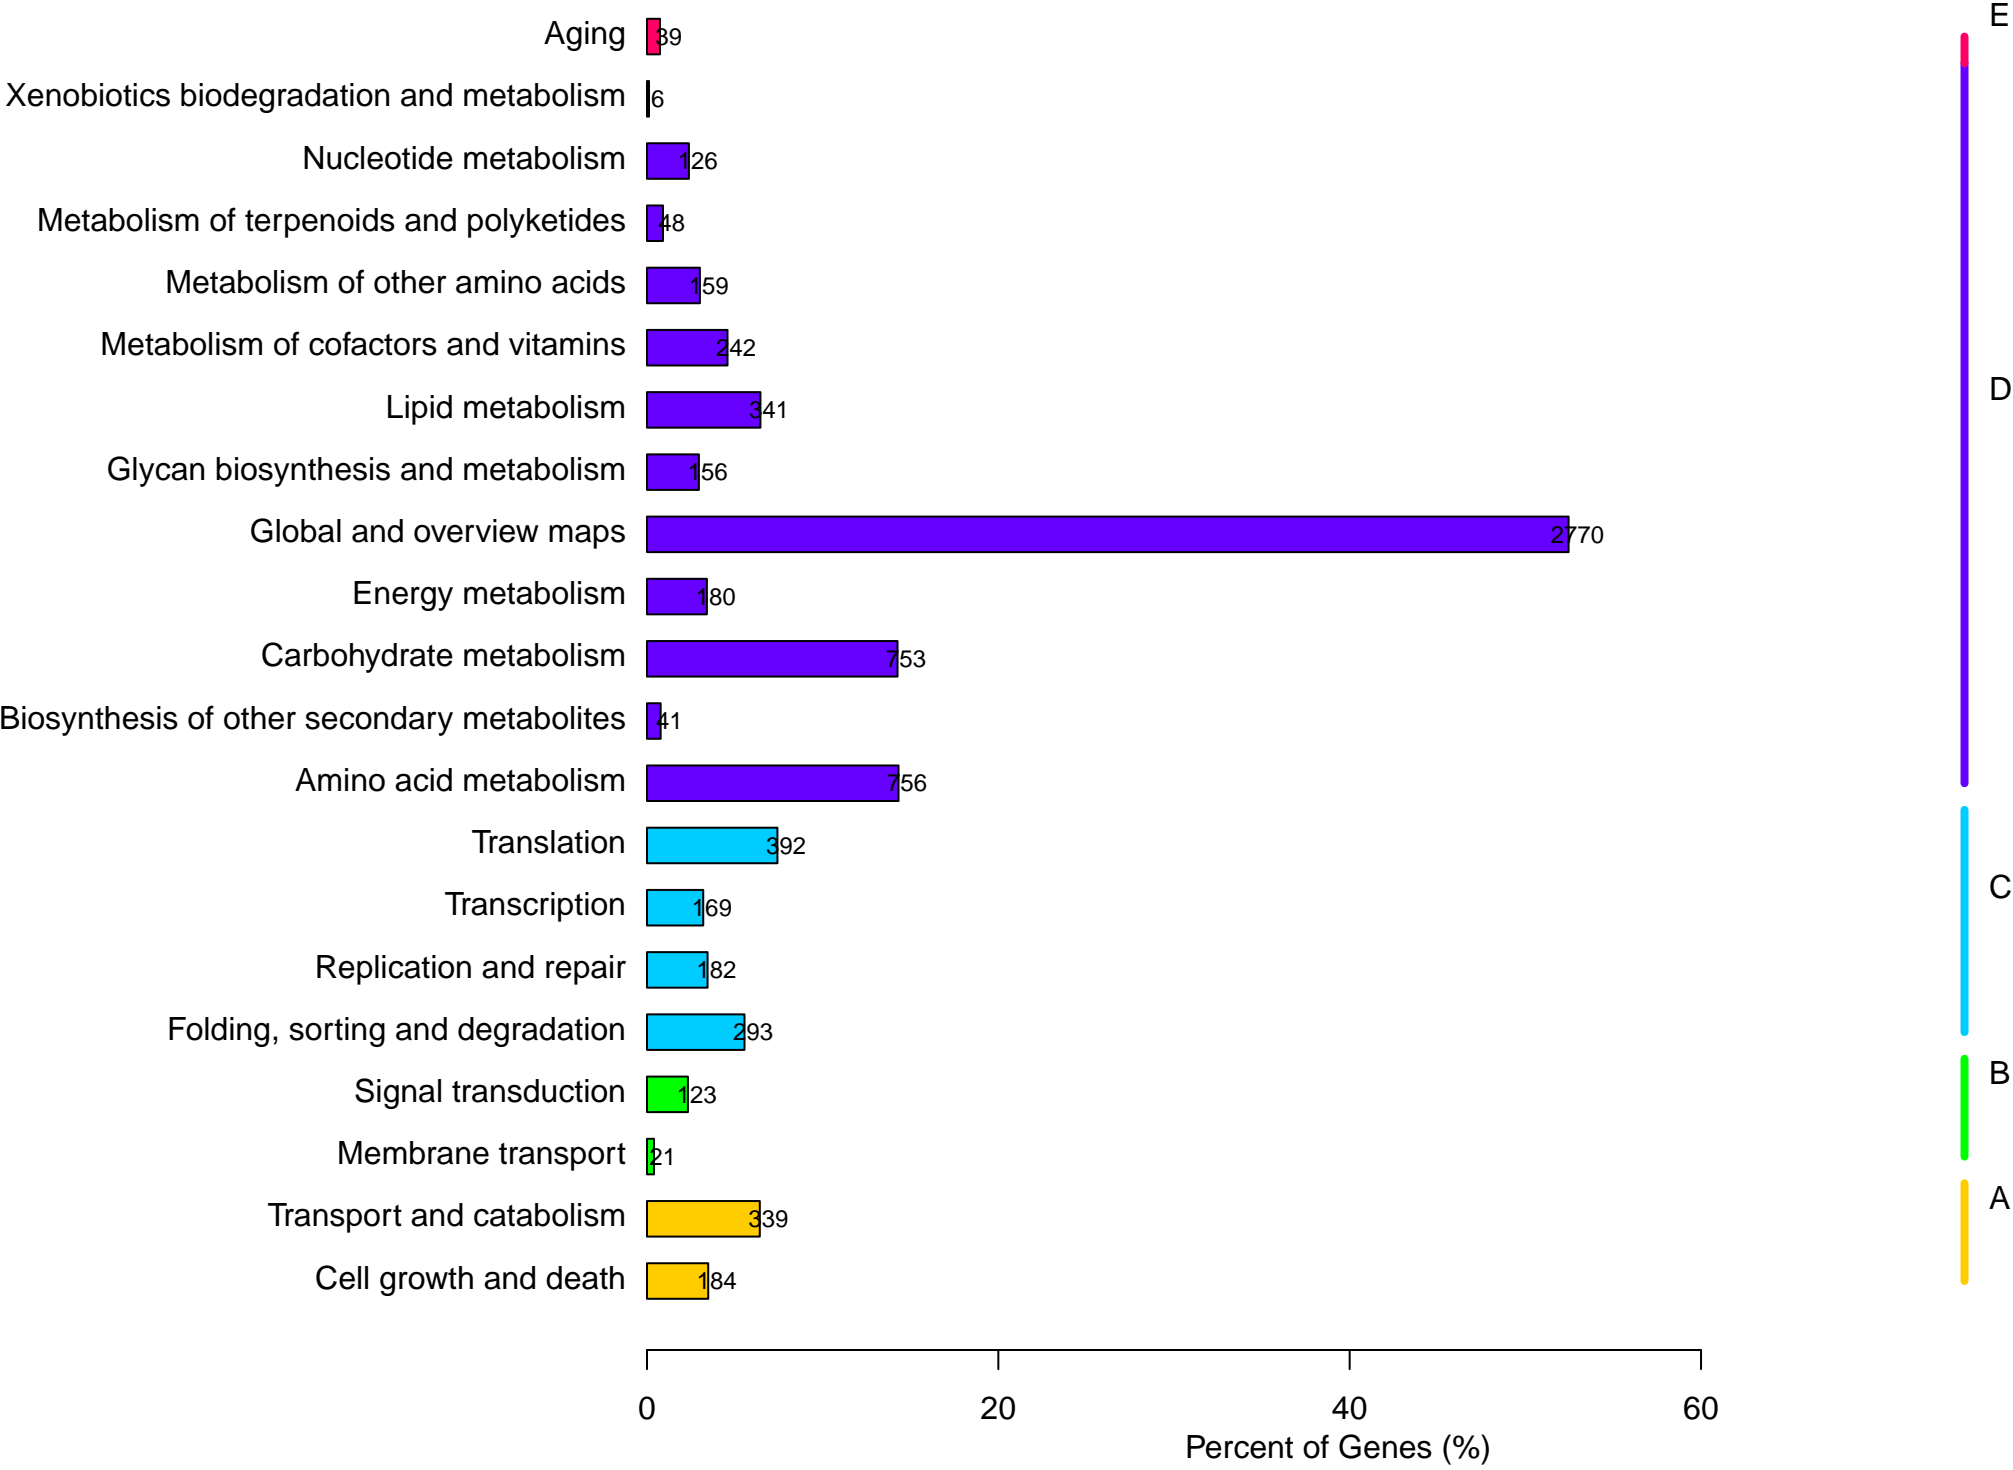

Supplement: Figure_S3.pdf [file Figure_S3.pdf]
