# Supplementary material for: Genome sequencing and CAZymes repertoire analysis of Diaporthe eres P3-1W causing postharvest fruit rot of ‘Hongyang’ kiwifruit in China
Source: PeerJ. 2024 Aug 5;12:e17715. doi: 10.7717/peerj.17715 (PMC11308996; doi:10.7717/peerj.17715)
Supplement: Supplemental Information 5 [file peerj-12-17715-s005.xlsx]

## Sheet: Sheet1
Table S2. The Diaporthe species used in the construction of phylogenetic tree
Species	Strain	Accession Number
		ITS1-4	TEF1
Diaporthe acaciigena	CBS 129521 = CPC 17622 (ex-type)	KC343005	KC343731
Diaporthe acerina	CBS 137.27	KC343006	KC343732
Diaporthe alleghaniensis	CBS 495.72 (isotype) = ATCC 24097 (ex-type)	KC343007	KC343733
Diaporthe alnea	CBS 146.46	KC343008	KC343734
Diaporthe ambigua	CBS 114015 (epitype ) = STE-U 2657 = CPC 2657 (ex-epitype)	KC343010	KC343736
Diaporthe ampelina	CBS 111888; ATCC 48153; STE-U 2673 = CPC 2673	KC343016	KC343742
Diaporthe amygdali	CBS 126679 (epitype )	KC343022	KC343748
Diaporthe anacardii	CBS 720.97 (epitype)	KC343024	KC343750
Diaporthe angelicae	CBS 111592 = AR3776 (ex-epitype)	KC343027	KC343753
Diaporthe arctii	CBS 136.25	KC343031	KC343757
Diaporthe arecae	CBS 161.64 (isotype of Subramanella arecae)	KC343032	KC343758
Diaporthe arengae	CBS 114979 (holotype) = HKUCC 5527 (ex-type)	KC343034	KC343760
Diaporthe aspalathi	CBS 117169 = STE-U 5428 = CPC 5428 (ex-epitype) = R412AY	KC343036	KC343762
Diaporthe australafricana	CBS 111886 = STE-U 2676 = CPC 2676 (ex-epitype)	KC343038	KC343764
Diaporthe batatas	CBS 122.21	KC343040	KC343766
Diaporthe beckhausii	CBS 138.27	KC343041	KC343767
Diaporthe bicincta	CBS 121004 = DP 0659	KC343134	KC343860
Diaporthe brasiliensis	CBS 133183 = LGMF924 = CPC 20300 (ex-epitype)	KC343042	KC343768
Diaporthe carpini	CBS 114437 = UPSC 2980	KC343044	KC343770
Diaporthe caulivora	CBS 127268 (neotype) = Dpc1 (ex-neotype)	KC343045	KC343771
Diaporthe celastrina	CBS 139.27 (ex-type)	KC343047	KC343773
Diaporthe cf. heveae1	CBS 852.97	KC343116	KC343842
Diaporthe cf. heveae2	CBS 681.84	KC343117	KC343843
Diaporthe chamaeropis	CBS 454.81	KC343048	KC343774
Diaporthe cinerascens	CBS 719.96	KC343050	KC343776
Diaporthe citri	CBS 199.39	KC343051	KC343777
Diaporthe convolvuli	CBS 124654 = DP 0727	KC343054	KC343780
Diaporthe crataegi	CBS 114435 = UPSC 2938	KC343055	KC343781
Diaporthe crotalariae	CBS 162.33 (type)	KC343056	KC343782
Diaporthe cuppatea	CBS 117499 (holotype) = STE-U 5431 = CPC 5431 (ex-type)	KC343057	KC343783
Diaporthe cynaroidis	CBS 122676 (holotype) = CMW 22190 = CPC 13180 (ex-type)	KC343058	KC343784
Diaporthe decedens	CBS 109772 = AR 3459	KC343059	KC343785
Diaporthe detrusa	CBS 109770 = AR 3424	KC343061	KC343787
Diaporthe elaeagni	CBS 504.72	KC343064	KC343790
Diaporthe endophytica	CBS 133811 (type) = LGMF916 = CPC 20292 (ex-type)	KC343065	KC343791
Diaporthe eres	CBS 439.82 (isotype of Phomopsis cotoneastri) = BBA P-407 = IMI 162181a	KC343090	KC343816
	CBS 101742	KC343073	KC343799
	CBS 109767 (type) = AR 3538 ex WJ 1643	KC343075	KC343801
Diaporthe eugeniae	CBS 444.82	KC343098	KC343824
Diaporthe fibrosa	CBS 109751 = AR 3425	KC343099	KC343825
Diaporthe foeniculacea	CBS 123208 (holotype of D. neotheicola) = Di-C004/5 (ex-type of D. neotheicola)	KC343104	KC343830
Diaporthe ganjae	CBS 180.91 = ILLS 43621 (ex-type)	KC343112	KC343838
Diaporthe gardeniae	CBS 288.56	KC343113	KC343839
Diaporthe helianthi	CBS 344.94	KC343114	KC343840
Diaporthe hickoriae	CBS 145.26 (type)	KC343118	KC343844
Diaporthe hongkongensis	CBS 115448 (holotype) = HKUCC 9104 = AT 646 DF 24 (ex-type)	KC343119	KC343845
Diaporthe hordei	CBS 481.92	KC343120	KC343846
Diaporthe impulsa	CBS 141.27	KC343122	KC343848
Diaporthe inconspicua	LGMF922 = CPC 20298	KC343124	KC343850
Diaporthe infecunda	LGMF933 = CPC 20309	KC343132	KC343858
Diaporthe longispora	CBS 194.36 (type of D. strumella var. longispora	KC343135	KC343861
Diaporthe lusitanicae	CBS 123213 = Di-C001/3	KC343137	KC343863
Diaporthe manihotia	CBS 505.76	KC343138	KC343864
Diaporthe mayteni	CBS 133185 = LGMF938 = CPC 20314 (ex-type)	KC343139	KC343865
Diaporthe megalospora	CBS 143.27	KC343140	KC343866
Diaporthe melonis	CBS 435.87	KC343141	KC343867
Diaporthe musigena	CBS 129519 (holotype) = CPC 17026 (ex-type)	KC343143	KC343869
Diaporthe neilliae	CBS 144.27	KC343144	KC343870
Diaporthe neoarctii	CBS 109490 = GB 6421 = AR 3450 (ex-type)	KC343145	KC343871
Diaporthe nomurai	CBS 157.29	KC343154	KC343880
Diaporthe novem	CBS 354.71	KC343158	KC343884
Diaporthe oncostoma	CBS 100454	KC343160	KC343886
Diaporthe oxe	CBS 133187 = LGMF936 = CPC 20312	KC343165	KC343891
Diaporthe padi var. padi	CBS 114649; UPSC 3496	KC343170	KC343896
Diaporthe paranensis	CBS 133184 (holotype) = LGMF929 = CPC 20305 (ex-type)	KC343171	KC343897
Diaporthe perjuncta	CBS 109745 = ARSEF 3461 = AR 3461 (ex-epitype)	KC343172	KC343898
Diaporthe perseae	CBS 151.73	KC343173	KC343899
Diaporthe phaseolorum	CBS 116020; STAM 31	KC343176	KC343902
Diaporthe pseudomangiferae	CBS 388.89	KC343182	KC343908
Diaporthe pseudophoenicicola	CBS 176.77	KC343183	KC343909
Diaporthe pustulata	CBS 109742 = AR 3430	KC343185	KC343911
Diaporthe raonikayaporum	CBS 133182 (holotype) = LGMF923 = CPC 20299 (ex-type)	KC343188	KC343914
Diaporthe rhoina	CBS 146.27	KC343189	KC343915
Diaporthe saccarata	CBS 116311 = STE-U 3743 = CPC 3743 (ex-type)	KC343190	KC343916
Diaporthe schini	LGMF910 = CPC 20286	KC343192	KC343918
Diaporthe sclerotioides	CBS 710.76 = PD 76/674	KC343194	KC343920
Diaporthe scobina	CBS 251.38	KC343195	KC343921
Diaporthe sojae	CBS 100.87	KC343196	KC343922
Diaporthe stictica	CBS 370.54	KC343212	KC343938
Diaporthe subordinaria	CBS 101711	KC343213	KC343939
Diaporthe tecomae	CBS 100547	KC343215	KC343941
Diaporthe terebinthifolii	CBS 133180 (holotype) = LGMF914 = CPC 20290 (ex-type)	KC343216	KC343942
Diaporthe toxica	CBS 535.93	KC343221	KC343947
Diaporthe vaccinii	CBS 113201 (epitype) = STE-U 5683 = CPC 5683 (ex-epitype)	KC343234	KC343960
Diaporthe vexans	CBS 127.14	KC343229	KC343955
Diaporthe viticola	CBS 113201 (epitype) = STE-U 5683 = CPC 5683 (ex-epitype)	KC343234	KC343960
Diaporthe woodii	CBS 558.93	KC343244	KC343970
Diaporthe woolworthii	CBS 148.27	KC343245	KC343971
