# Supplementary material for: Genome sequencing and CAZymes repertoire analysis of Diaporthe eres P3-1W causing postharvest fruit rot of ‘Hongyang’ kiwifruit in China
Source: PeerJ. 2024 Aug 5;12:e17715. doi: 10.7717/peerj.17715 (PMC11308996; doi:10.7717/peerj.17715)
Supplement: Supplemental Information 6 [file peerj-12-17715-s006.xlsx]

## Sheet: Sheet1
Table S3. Blast results of 11 isolates from diseased 'Hongyang' kiwifruit
Isolates	Species	Accession number	Identitiy	ITS Sequence
P1-1w-1	Alternaria alternata	OR418487.1	1	TTTGATATGCTTAAGTTCAGCGGGTATCCCTACCTGATCCGAGGTCAAAAGTTGAAAAAAAGGCTTAATGGATGCTAGACCTTTGCTGATAGAGAGTGCGACTTGTGCTGCGCTCCGAAACCAGTAGGCCGGCTGCCAATTACTTTAAGGCGAGTCTCCAGCAAAGCTAGAGACAAGACGCCCAACACCAAGCAAAGCTTGAGGGTACAAATGACGCTCGAACAGGCATGCCCTTTGGAATACCAAAGGGCGCAATGTGCGTTCAAAGATTCGATGATTCACTGAATTCTGCAATTCACACTACTTATCGCATTTCGCTGCGTTCTTCATCGATGCCAGAACCAAGAGATCCGTTGTTGAAAGTTGTAATTATTAATTTGTTACTGACGCTGATTGCAA…
P1-2w-1	Alternaria tenuissima	OQ001060.1	1	ATGATATGCTTAAGTTCAGCGGGTATCCCTACCTGATCCGAGGTCAAAAGTTGAAAAAAAGGCTTAATGGATGCTAGACCTTTGCTGATAGAGAGTGCGACTTGTGCTGCGCTCCGAAACCAGTAGGCCGGCTGCCAATTACTTTAAGGCGAGTCTCCAGCAAAGCTAGAGACAAGACGCCCAACACCAAGCAAAGCTTGAGGGTACAAATGACGCTCGAACAGGCATGCCCTTTGGAATACCAAAGGGCGCAATGTGCGTTCAAAGATTCGATGATTCACTGAATTCTGCAATTCACACTACTTATCGCATTTCGCTGCGTTCTTCATCGATGCCAGAACCAAGAGATCCGTTGTTGAAAGTTGTAATTATTAATTTGTTACTGACGCTGATTGCAAT…
Z1-1n-1	Diaporthe spp. (anamorph: Phomopsis spp.)	OR858974.1	0.9982	TTTTGATATGCTTAAGTTCAGCGGGTATTCCTACCTGATCCGAGGTCAAATTTTCAGAAGTTGGGGGTTTAACGGCAGGGCACCGCCAGGGCCTTCCAAAGCGAGGGTTTAACTACTGCGCTCGGGGTCCTGGCGAGCTCGCCACTGAATTTCAGGGCCTGCCCTTTTACAAGCAGTGCCCCATCACCAAGCCAGGCTTGAGGGTTGAAATGACGCTCGAACAGGCATGCCCTCCGGAATACCAGAGGGCGCAATGTGCGTTCAAAGATTCGATGATTCACTGAATTCTGCAATTCACATTACTTATCGCATTTCGCTGCGTTCTTCATCGATGCCAGAACCAAGAGATCCGTTGTTGAAAGTTTTGATTCATTTATGTTTTGTGCTCAGAGTTTCAGT…
G2-3n-4	Diaporthe spp. (anamorph: Phomopsis spp.)	KU375736.1	1	CTGCGGAGGGATCATTGCTGGAACGCGCCCCAGGCGCACCCAGAAACCCTTTGTGAACTTATACCTTACTGTTGCCTCGGCGCTAGCTGGTCCTTCGGGGCCCCTCACCCTCGGGTGTTGAGACAGCCCGCCGGCGGCCAACCCAACTCTTGTTTTTACACTGAAACTCTGAGAATAAAACATAAATGAATCAAAACTTTCAACAACGGATCTCTTGGTTCTGGCATCGATGAAGAACGCAGCGAAATGCGATAAGTAATGTGAATTGCAGAATTCAGTGAATCATCGAATCTTTGAACGCACATTGCGCCCTCTGGTATTCCGGAGGGCATGCCTGTTCGAGCGTCATTTCAACCCTCAAGCCTGGCTTGGTGATGGGGCACTGCTTCTTACCCAAGA…
G1-1w-1	Diaporthe spp. (anamorph: Phomopsis spp.)	KU375736.1	0.9929	CTGCGGAGGGATCATTGCTGGAACGCGCCCCAGGCGCACCCAGAAACCCTTTGTGAACTTATACCTTACTGTTGCCTCGGCGCAAGCTGGTCCTTCGGGGCCCCTCACCCTCGGGTGTTGAGACAGCCCGCCGGCGGCCAACCCAACTCTTGTTTTTACACTGAAACTCTGAGCACAAAACATAAATGAATCAAAACTTTCAACAACGGATCTCTTGGTTCTGGCATCGATGAAGAACGCAGCGAAATGCGATAAGTAATGTGAATTGCAGAATTCAGTGAATCATCGAATCTTTGAACGCACATTGCGCCCTCTGGTATTCCGGAGGGCATGCCTGTTCGAGCGTCATTTCAACCCTCAAGCCTGGCTTGGTGATGGGGCACTGCTTCTTACCCAAGG…
G3-2n	Diaporthe eres	MN816418.1	1	ATATGCTTAAGTTCAGCGGGTATTCCTACCTGATCCGAGGTCAAATTTTCAGAAGTTGGGGGTTTAACGGCAGGGCACCGCCAGGGCCTTCCAAAGCGAGGGTTTAACTACTGCGCTCGGGGTCCTGGCGAGCTCGCCACTGAATTTCAGGGCCTGCCCTTTTACAGGCAGTGCCCCATCACCAAGCCAGGCTTGAGGGTTGAAATGACGCTCGAACAGGCATGCCCTCCGGAATACCAGAGGGCGCAATGTGCGTTCAAAGATTCGATGATTCACTGAATTCTGCAATTCACATTACTTATCGCATTTCGCTGCGTTCTTCATCGATGCCAGAACCAAGAGATCCGTTGTTGAAAGTTTTGATTCATTTATGTTTTATTCTCAGAGTTTCAGTGTAAA…
P3-3z-1	Diaporthe eres	MN816418.1	1	ATGATATGCTTAAGTTCAGCGGGTATTCCTACCTGATCCGAGGTCAAATTTTCAGAAGTTGGGGGTTTAACGGCAGGGCACCGCCAGGGCCTTCCAAAGCGAGGGTTTAACTACTGCGCACTGAATTTCAGGGCCTGCCCTTTTACAGGCAGTGCCCCATCACCAAGCCAGGCTTGAGGGTTGAAATGCTCGGGGTCCTGGCGAGCTCGCACGCTCGAACAGGCATGCCCTCCGGAATACCAGAGGGCGCAATGTGCGTTCAAAGATTCGATGATTCACTGAATTCTGCAATTCACATTACTTATCGCATTTCGCTGCGTTCTTCATCGATGCCAGAACCAAGAGATCCGTTGTTGAAAGTTTTGATTCATTTATGTTTTATTCTCAGAGTTTCAGTGT…
P3-1w	Diaporthe eres	MN816418.1	1	GATATGCTTAAGTTCAGCGGGTATTCCTACCTGATCCGAGGTCAAATTTTCAGAAGTTGGGGGTTTAACGGCAGGGCACCGCCAGGGCCTTCCAAAGCGAGGGTTTAACTACTGCGCTCGGGGTCCTGGCGAGCTCGCCACTGAATTTCAGGGCCTGCCCTTTTACAGGCAGTGCCCCATCACCAAGCCAGGCTTGAGGGTTGAAATGACGCTCGAACAGGCATGCCCTCCGGAATACCAGAGGGCGCAATGTGCGTTCAAAGATTCGATGATTCACTGAATTCTGCAATTCACATTACTTATCGCATTTCGCTGCGTTCTTCATCGATGCCAGAACCAAGAGATCCGTTGTTGAAAGTTTTGATTCATTTATGTTTTATTCTCAGAGTTTCAGTGTAA…
P2-1W	Phomopsis spp.	MF800893.1	0.9982	CTGCGGAGGGATCATTGCTGGAACGCGCCCCAGGCGCACCCAGAAACCCTTTGTGAACTTATACCTTACTGTTGCCTCGGCGCTAGCTGGTCCTCCGGGGCCCCTCACCCCCGGGTGTTGAGACGGCACGCCGGCGGCCAACCCAACTCTTGTTTTTACACTGAAACTCTGAGCACAAAACATAAATGAATCAAAACTTTCAACAACGGATCTCTTGGTTCTGGCATCGATGAAGAACGCAGCGAAATGCGATAAGTAATGTGAATTGCAGAATTCAGTGAATCATCGAATCTTTGAACGCACATTGCGCCCTCTGGTATTCCGGAGGGCATGCCTGTTCGAGCGTCATTTCAACCCTCAAGCCTGGCTTGGTGATGGGGCACTGCCTGTAAAAGGGCA…
P3-2W	Diaporthe eres	MN816418.1	1	TATGCTTAAGTTCAGCGGGTATTCCTACCTGATCCGAGGTCAAATTTTCAGAAGTTGGGGGTTTAACGGCAGGGCACCGCCAGGGCCTTCCAAAGCGAGGGTTTAACTACTGCGCTCGGGGTCCTGGCGAGCTCGCCACTGAATTTCAGGGCCTGCCCTTTTACAGGCAGTGCCCCATCACCAAGCCAGGCTTGAGGGTTGAAATGACGCTCGAACAGGCATGCCCTCCGGAATACCAGAGGGCGCAATGTGCGTTCAAAGATTCGATGATTCACTGAATTCTGCAATTCACATTACTTATCGCATTTCGCTGCGTTCTTCATCGATGCCAGAACCAAGAGATCCGTTGTTGAAAGTTTTGATTCATTTATGTTTTATTCTCAGAGTTTCAGTGTAAAA…
Z1-1W	Diaporthe eres	OR858974.1	0.9982	ATGCGGAGGGATCATTGCTGGAACGCGCCCCAGGCGCACCCAGAAACCCTTTGTGAACTTATACCTTACTGTTGCCTCGGCGCATGCCGGCCCCCCTGGGGGCCCCTCCTTCTGGAGGAGCAGGCACGCCGGCGGCCAACCTAACTCTTGTTTTTACACTGAAACTCTGAGCACAAAACATAAATGAATCAAAACTTTCAACAACGGATCTCTTGGTTCTGGCATCGATGAAGAACGCAGCGAAATGCGATAAGTAATGTGAATTGCAGAATTCAGTGAATCATCGAATCTTTGAACGCACATTGCGCCCTCTGGTATTCCGGAGGGCATGCCTGTTCGAGCGTCATTTCAACCCTCAAGCCTGGCTTGGTGATGGGGCACTGCTTGTAAAAGGGCAGG…
