# Supplementary material for: Genome sequencing and CAZymes repertoire analysis of Diaporthe eres P3-1W causing postharvest fruit rot of ‘Hongyang’ kiwifruit in China
Source: PeerJ. 2024 Aug 5;12:e17715. doi: 10.7717/peerj.17715 (PMC11308996; doi:10.7717/peerj.17715)
Supplement: Supplemental Information 7 [file peerj-12-17715-s007.xlsx]

## Sheet: Sheet1
Table S4 Each measured value of the activity of four enzymes ( PG, PME, Cx and β-Gal)
Days after inoculation	Repeat	PG activity (U/mL)		PME activity (U/mL)		Cx activity (U/mL)		β-Gal activity (U/mL)
		Control	Treated samples	Control	Treated samples	Control	Treated samples	Control	Treated samples
0	repeat 1	254.108	254.108	202.159	202.159	84.4221	84.4221	0.055657	0.055657
	repeat 2	264.202	264.202	201.565	201.565	85.3689	85.3689	0.0574007	0.0574007
	repeat 3	262.42	262.42	198.3	198.3	86.3157	86.3157	0.0678625	0.0678625
1	repeat 1	267.764	424.919	203.049	276.877	97.6772	221.076	0.0678625	0.177712
	repeat 2	277.857	415.42	202.456	284.892	80.9506	195.828	0.0643752	0.195148
	repeat 3	263.608	431.45	200.378	275.393	75.5854	210.345	0.0661189	0.163763
2	repeat 1	263.608	1053.07	203.346	441.929	93.89	510.162	0.0748371	0.615366
	repeat 2	257.671	1080.38	201.565	420.259	81.8974	514.896	0.0713498	0.594442
	repeat 3	293.293	1025.76	201.268	452.022	99.2552	528.151	0.0818116	0.573518
3	repeat 1	210.174	740.774	207.205	414.915	108.723	418.639	0.0591443	0.388692
	repeat 2	238.078	746.117	204.534	388.792	103.042	448.936	0.055657	0.39218
	repeat 3	234.516	804.301	205.127	392.651	102.727	437.259	0.0678625	0.346845
4	repeat 1	252.921	641.624	209.58	324.077	110.617	335.953	0.0643752	0.0748371
	repeat 2	245.797	645.78	206.612	349.904	115.666	364.041	0.0608879	0.0591443
	repeat 3	244.609	684.965	208.393	330.905	119.453	352.679	0.0678625	0.0539134
5	repeat 1	313.48	926.012	208.69	411.056	124.819	445.149	0.0748371	0.0574007
	repeat 2	321.198	920.075	211.658	382.261	125.45	447.043	0.0678625	0.0451952
	repeat 3	279.638	869.015	207.502	383.745	124.187	430.001	0.080068	0.0661189
